# Supplementary material
Source: PubMed Central journal article supplement (PMC7256349)
Supplement: TBSD_A_1766572_SM4844.pdf [file TBSD_A_1766572_SM4844.pdf]

## Supplementary data

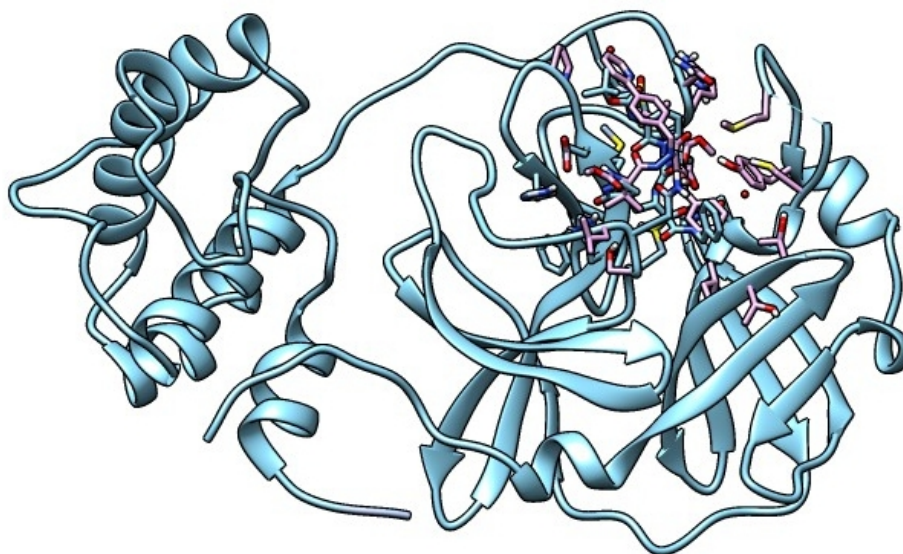

**Figure S1:** Superimposed protein three dimensional X-ray crystal structures of SARS-CoV-2 M<sup>pro</sup>, (PDB ID: 6Y2F in blue) and (PDB ID: 5R7Z in light yellow).

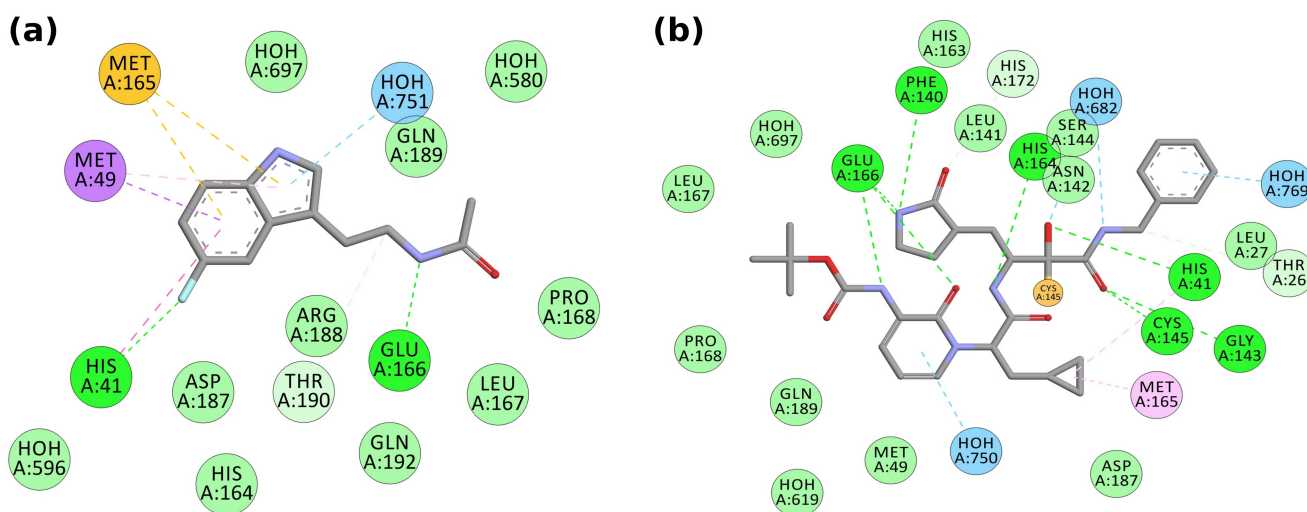

**Figure S2:** Binding pattern of co-crystallized ligand of SARS-CoV-2 M<sup>pro</sup>, (a) PDB ID: 5R7Z (b) PDB ID: 6Y2F.



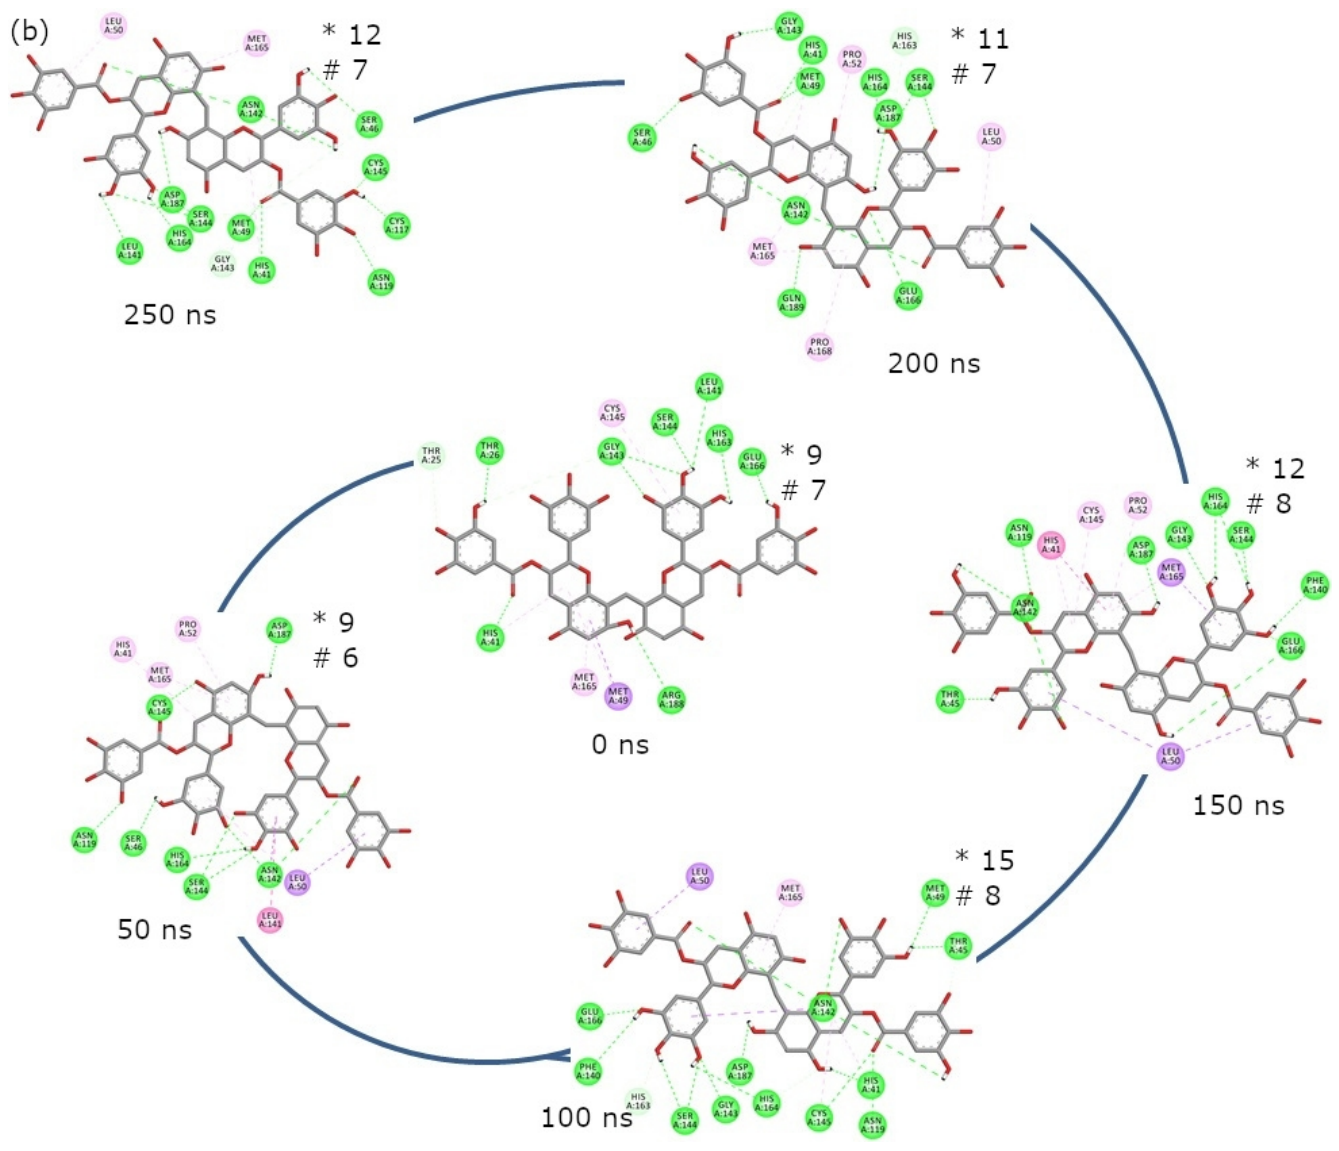

(c)

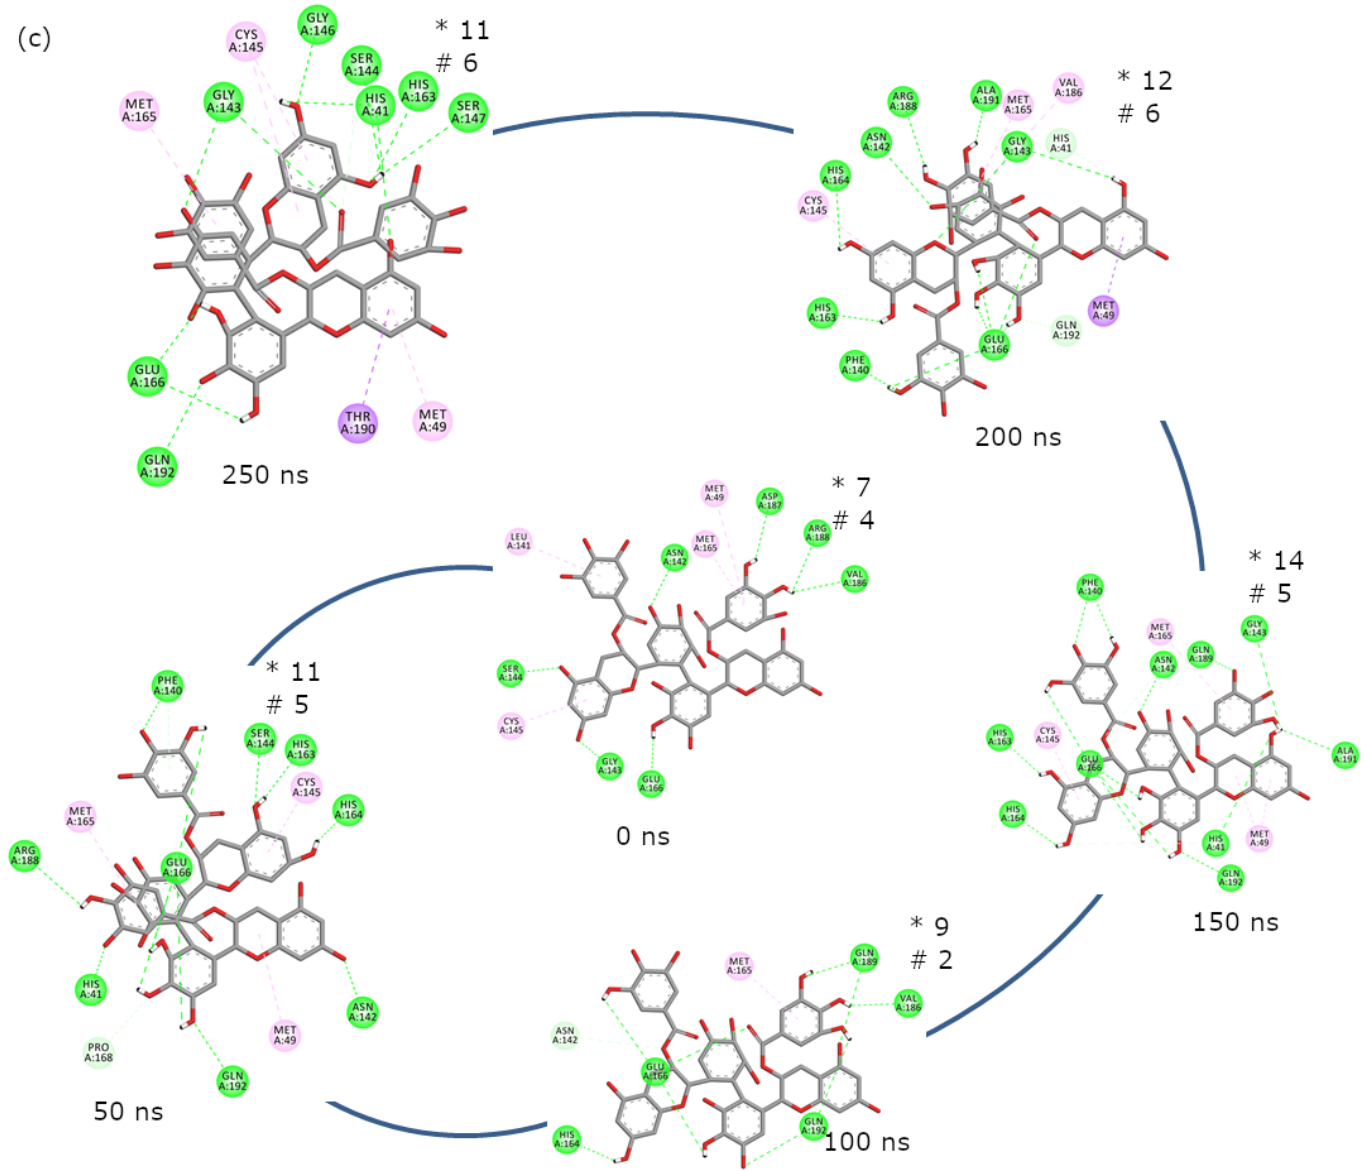





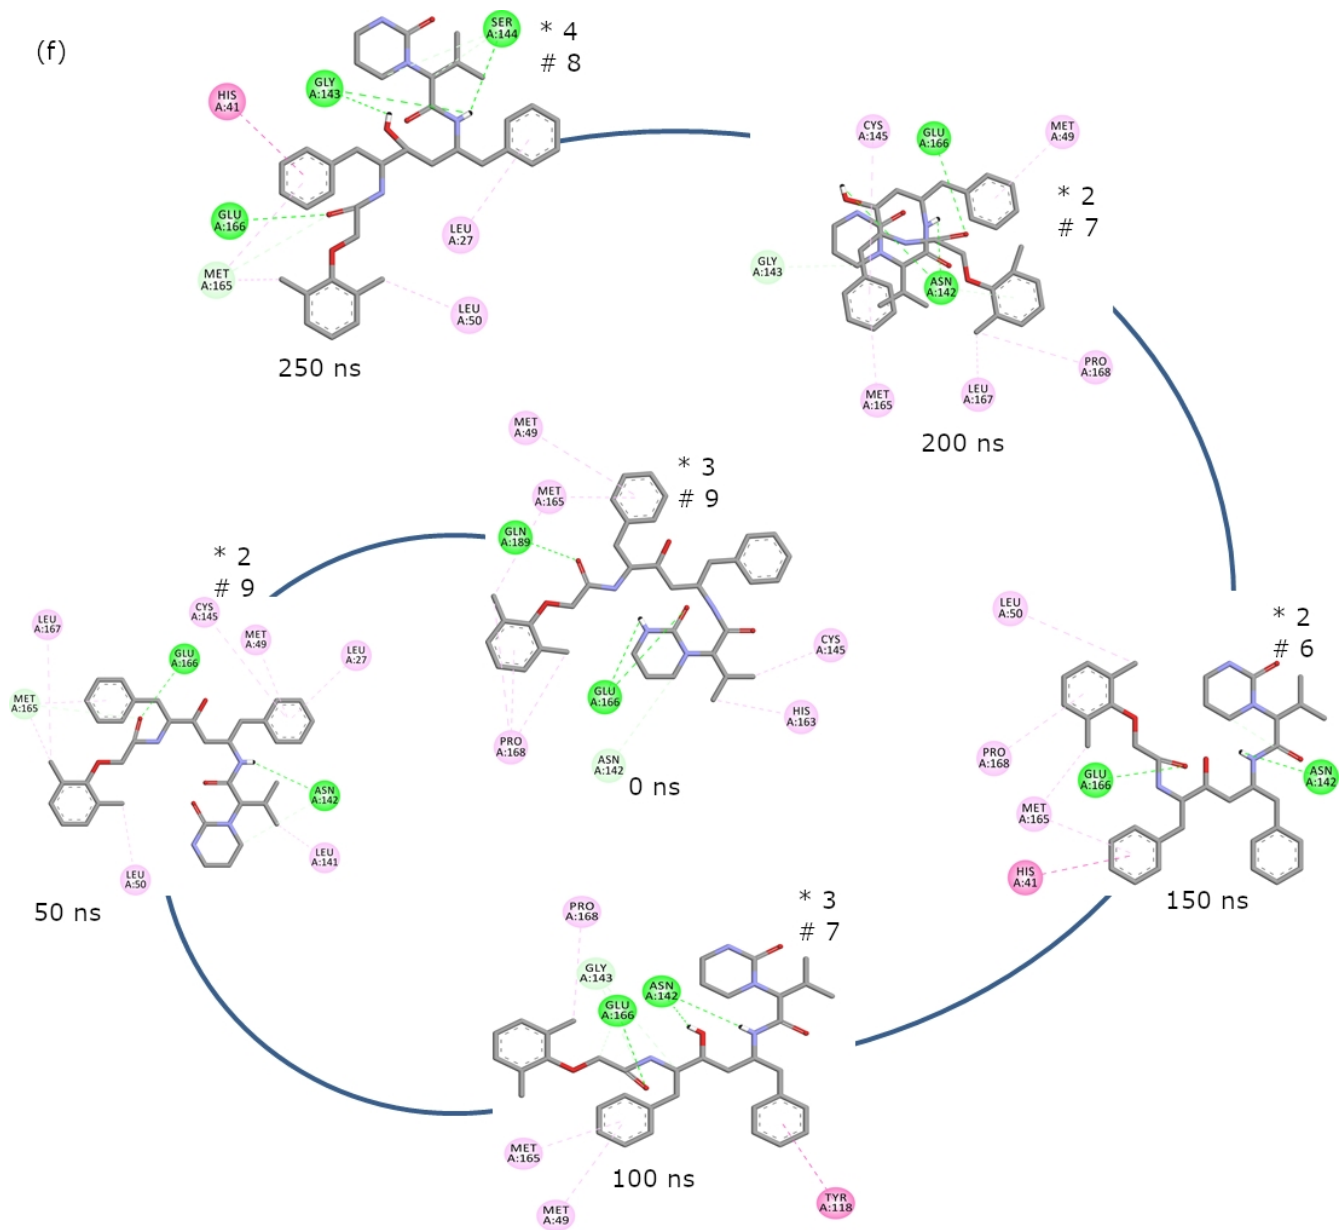

**Figure S3:** 2D interactions showing hydrogen bonds (green) and hydrophobic interactions (Pink, light pink, blue, and cyan) at different time period of MD-simulations in the binding pocket of the SARS-CoV-2 M<sup>pro</sup> visualized by Discovery studio. (a) Theaflavin-3-O-gallate (b) Oolonghomobisflavan-A (c) Theasinensin-D (d) Atazanavir (e) Darunavir, and (f) Lopinavir.

\* No. of hydrogen bonds

# No. of hydrophobic interactions



**Table S1:** CDOCKER interaction energies of selected 65 bio-active molecules and 3 FDA approved drugs.

| S. No. | Molecules                         | -CDOCKER Interaction Energy |
|--------|-----------------------------------|-----------------------------|
| 1.     | Oolonghomobisflavan A             | 75.54                       |
| 2.     | Theasinensin D                    | 71.58                       |
| 3.     | Theaflavin-3'-O-Gallate           | 71.56                       |
| 4.     | Isotheaflavin                     | 71.22                       |
| 5.     | Epigallocatechin-3,5-Di-O-Gallate | 66.99                       |
| 6.     | Oolonghomobisflavan B             | 66.87                       |
| 7.     | Atazanavir                        | 64.85                       |
| 8.     | Epigallocatechin-3,4-Di-O-Gallate | 63.33                       |
| 9.     | Vicenin 2                         | 60.82                       |
| 10.    | Epicatechin-3,5-Di-O-Gallate      | 60.22                       |
| 11.    | Rutin                             | 58.07                       |
| 12.    | Proanthocyanidin                  | 57.83                       |
| 13.    | Pheophytin                        | 56.29                       |
| 14.    | Lopinavir                         | 56.17                       |
| 15.    | Epitheaflavic Acid 3'-Gallate     | 54.32                       |
| 16.    | Epigallocatechin Gallate          | 53.14                       |
| 17.    | Theasinensin E                    | 52.96                       |
| 18.    | Myricitrin                        | 52.69                       |
| 19.    | Theaflavin                        | 52.63                       |
| 20.    | Epicatechin Gallate               | 51.99                       |
| 21.    | Kaempferitrin                     | 51.04                       |
| 22.    | Isoquercetin                      | 48.84                       |
| 23.    | Epiafzelechin 3-O-Gallate         | 48.34                       |
| 24.    | Pheophorbide                      | 47.31                       |
| 25.    | Epigallocatechin 3-O-P-Coumarate  | 46.53                       |
| 26.    | Pheophorbide                      | 46.34                       |
| 27.    | Darunavir                         | 46.02                       |
| 28.    | Cryptoxanthin                     | 45.08                       |
| 29.    | Isovitexin                        | 44.92                       |
| 30.    | Vitexin                           | 44.63                       |
| 31.    | Chlorogenic Acid                  | 42.95                       |
| 32.    | Coumaroyl Quinic Acid             | 42.94                       |
| 33.    | Epigallocatechin                  | 42.09                       |
| 34.    | Theaflavic Acid                   | 40.64                       |
| 35.    | Barrigenol R1                     | 40.63                       |
| 36.    | Barringtogenol                    | 40.14                       |
| 37.    | Camelliagenin                     | 39.18                       |
| 38.    | Gallocatechin                     | 39                          |
| 39.    | Catechin                          | 36.99                       |
| 40.    | Epicatechin                       | 36.39                       |
| 41.    | Epiafzelechin                     | 33.85                       |
| 42.    | Quercetin                         | 33.59                       |
| 43.    | Cryptoxanthin                     | 33.42                       |
| 44.    | Myricetin                         | 33.3                        |



|            |                    |       |
|------------|--------------------|-------|
| <b>45.</b> | Apigenin           | 33.25 |
| <b>46.</b> | Nerolidol          | 33.11 |
| <b>47.</b> | Kaempferol         | 32.04 |
| <b>48.</b> | Theanine           | 31.93 |
| <b>49.</b> | Ascorbic Acid      | 30.14 |
| <b>50.</b> | Quinic Acid        | 29.07 |
| <b>51.</b> | Succinic Acid      | 25.3  |
| <b>52.</b> | Methyl Salicylate  | 25.19 |
| <b>53.</b> | Theobromine        | 24.36 |
| <b>54.</b> | Caffeine           | 24.21 |
| <b>55.</b> | Xanthine           | 23.73 |
| <b>56.</b> | Linalool Oxide     | 23.71 |
| <b>57.</b> | Phenylacetaldehyde | 23.02 |
| <b>58.</b> | Methylxanthine     | 22.66 |
| <b>59.</b> | Theophylline       | 22.38 |
| <b>60.</b> | Geraniol           | 21.81 |
| <b>61.</b> | Hexanal            | 21.32 |
| <b>62.</b> | Diphenylamine      | 20.57 |
| <b>63.</b> | Trans-2-Hexenal    | 20.22 |
| <b>64.</b> | Linalool           | 20.19 |
| <b>65.</b> | Phenylethanol      | 18.82 |
| <b>66.</b> | Cis-3-Hexenol      | 18.21 |
| <b>67.</b> | Benzaldehyde       | 18.2  |
| <b>68.</b> | Oxalic Acid        | 17.91 |

---

**Table S2:** Energy contribution of the key residues computed by MM-PBSA method.

| <b>S. No.</b> | <b>Molecules</b>        | <b>Residues with contribution energy (kJ/mol)</b>                   |
|---------------|-------------------------|---------------------------------------------------------------------|
| 1.            | Atazanavir              | HIS41 (-3.82), MET49 (-10.69), MET165 (-14.52),<br>GLU166 (-4.29)   |
| 2.            | Darunavir               | HIS41 (-6.83), MET165 (-10.14), GLU166 (-3.11)                      |
| 3.            | Lopinavir               | LEU50 (-9.52), MET165 (-10.30), GLU166 (-4.33)                      |
| 4.            | Oolonghomobisflavan-A   | MET49 (-15.47), PHE140 (-12.08), MET165 (-4.90),<br>GLU166 (-18.58) |
| 5.            | Theasinensin-D          | LEU50 (-10.89), PHE140 (-8.43), MET165 (-10.97),<br>GLU166 (-6.02)  |
| 6.            | Theaflavin-3'-O-Gallate | HIS41 (-6.79), LEU50 (-10.50), MET165 (-17.60),<br>GLU166 (-17.00)  |
