# Supplementary material
Source: PubMed Central journal article supplement (PMC7256349)
Supplement: TBSD_A_1766572_SM5637.pdf [file TBSD_A_1766572_SM5637.pdf]

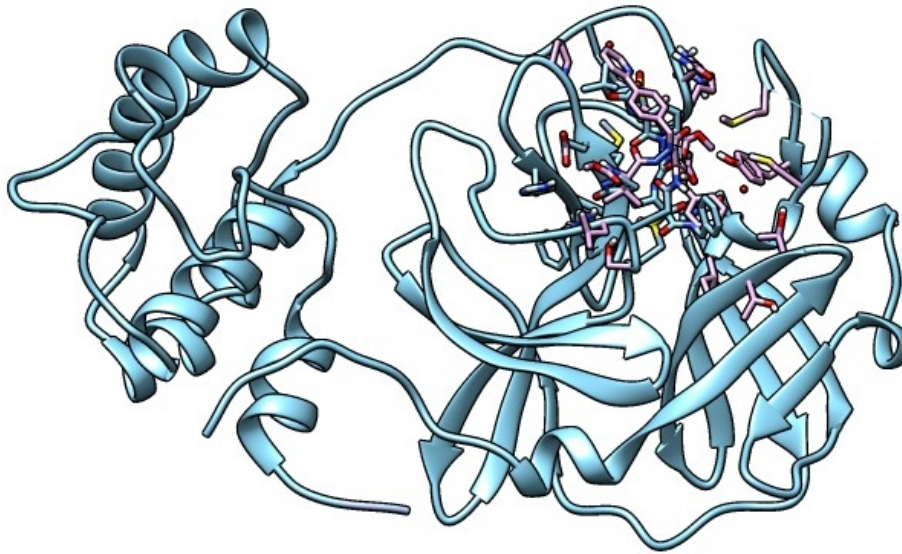

**Figure S1:** Superimposed protein three dimensional X-ray crystal structures of SARS-CoV-2 M<sup>pro</sup>, (PDB ID: 6Y2F in blue) and (PDB ID: 5R7Z in light yellow).

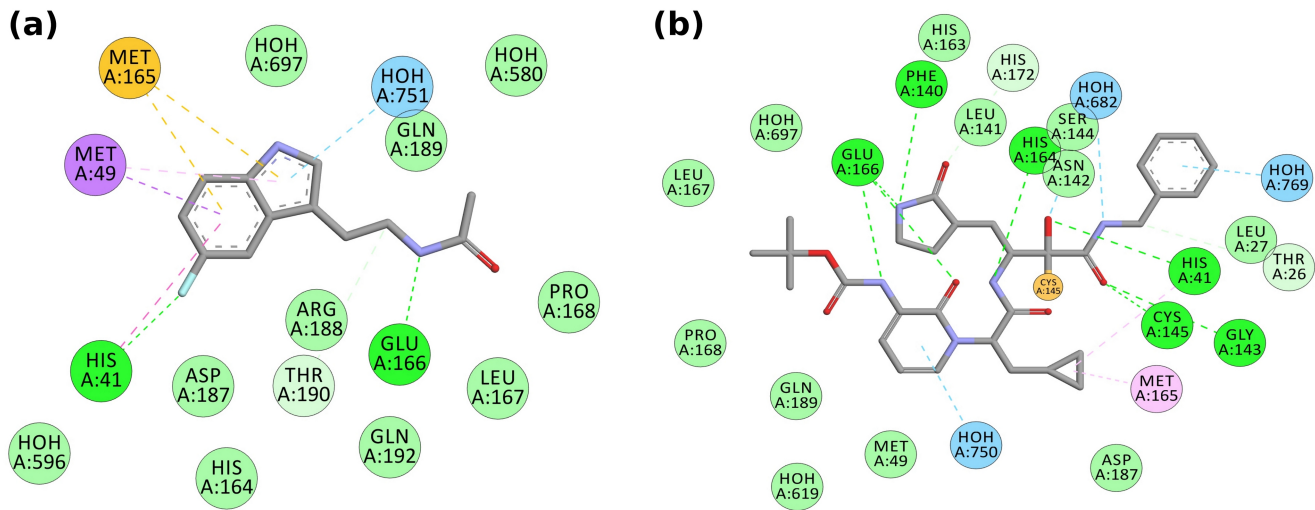

**Figure S2:** Binding pattern of co-crystallized ligand of SARS-CoV-2 M<sup>pro</sup>, (a) PDB ID: 5R7Z (b) PDB ID: 6Y2F.









(e)

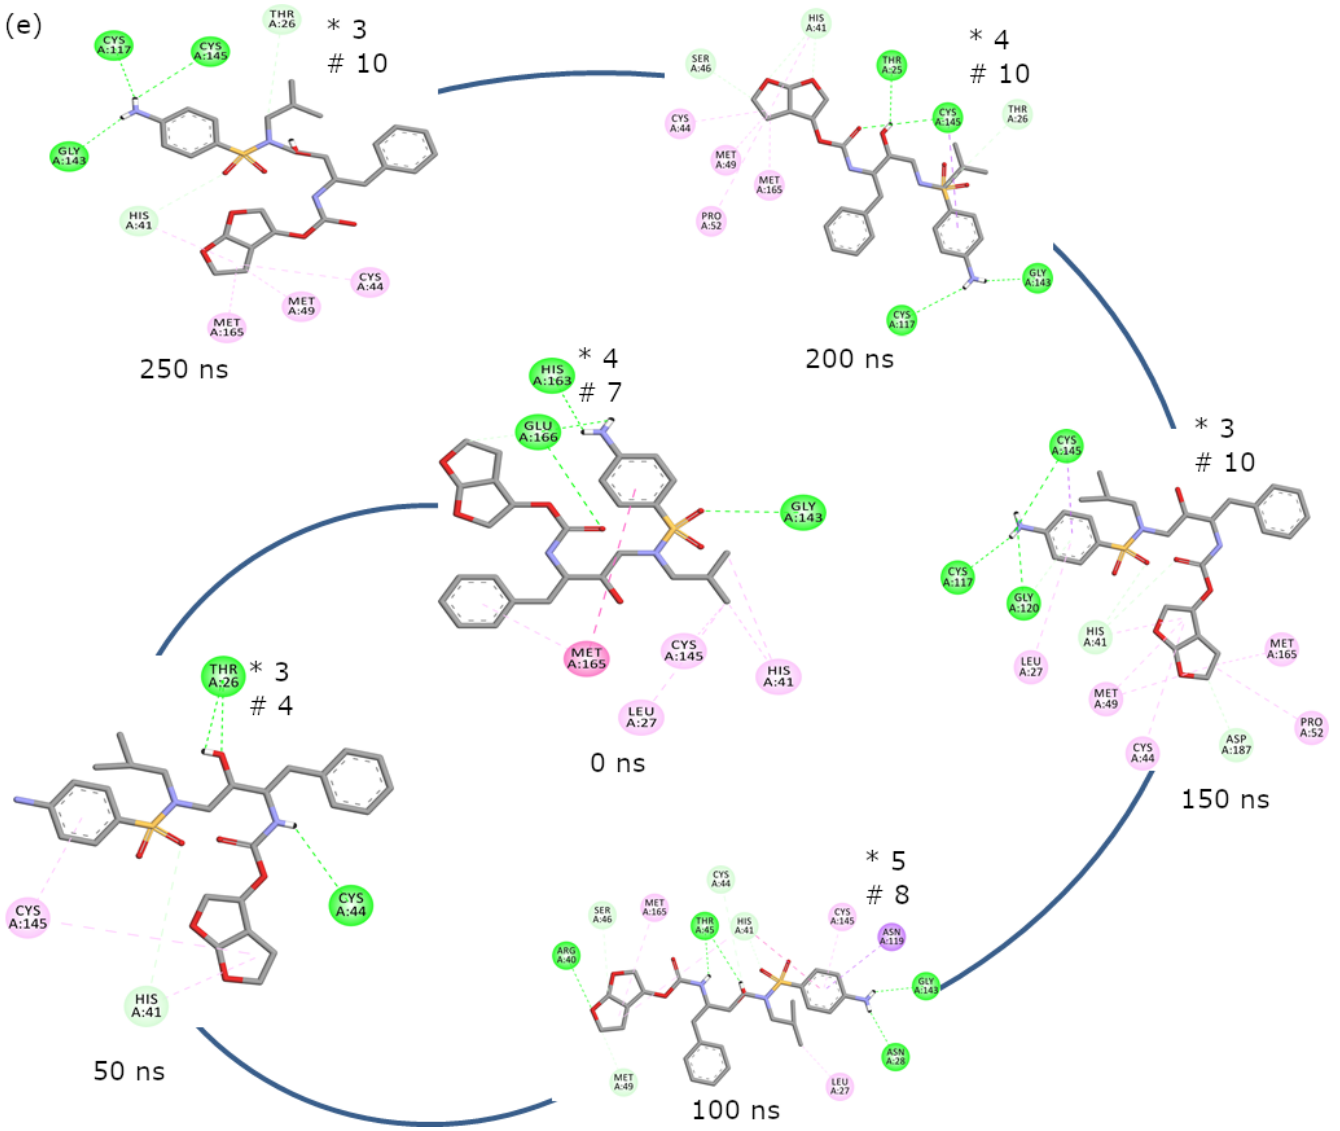

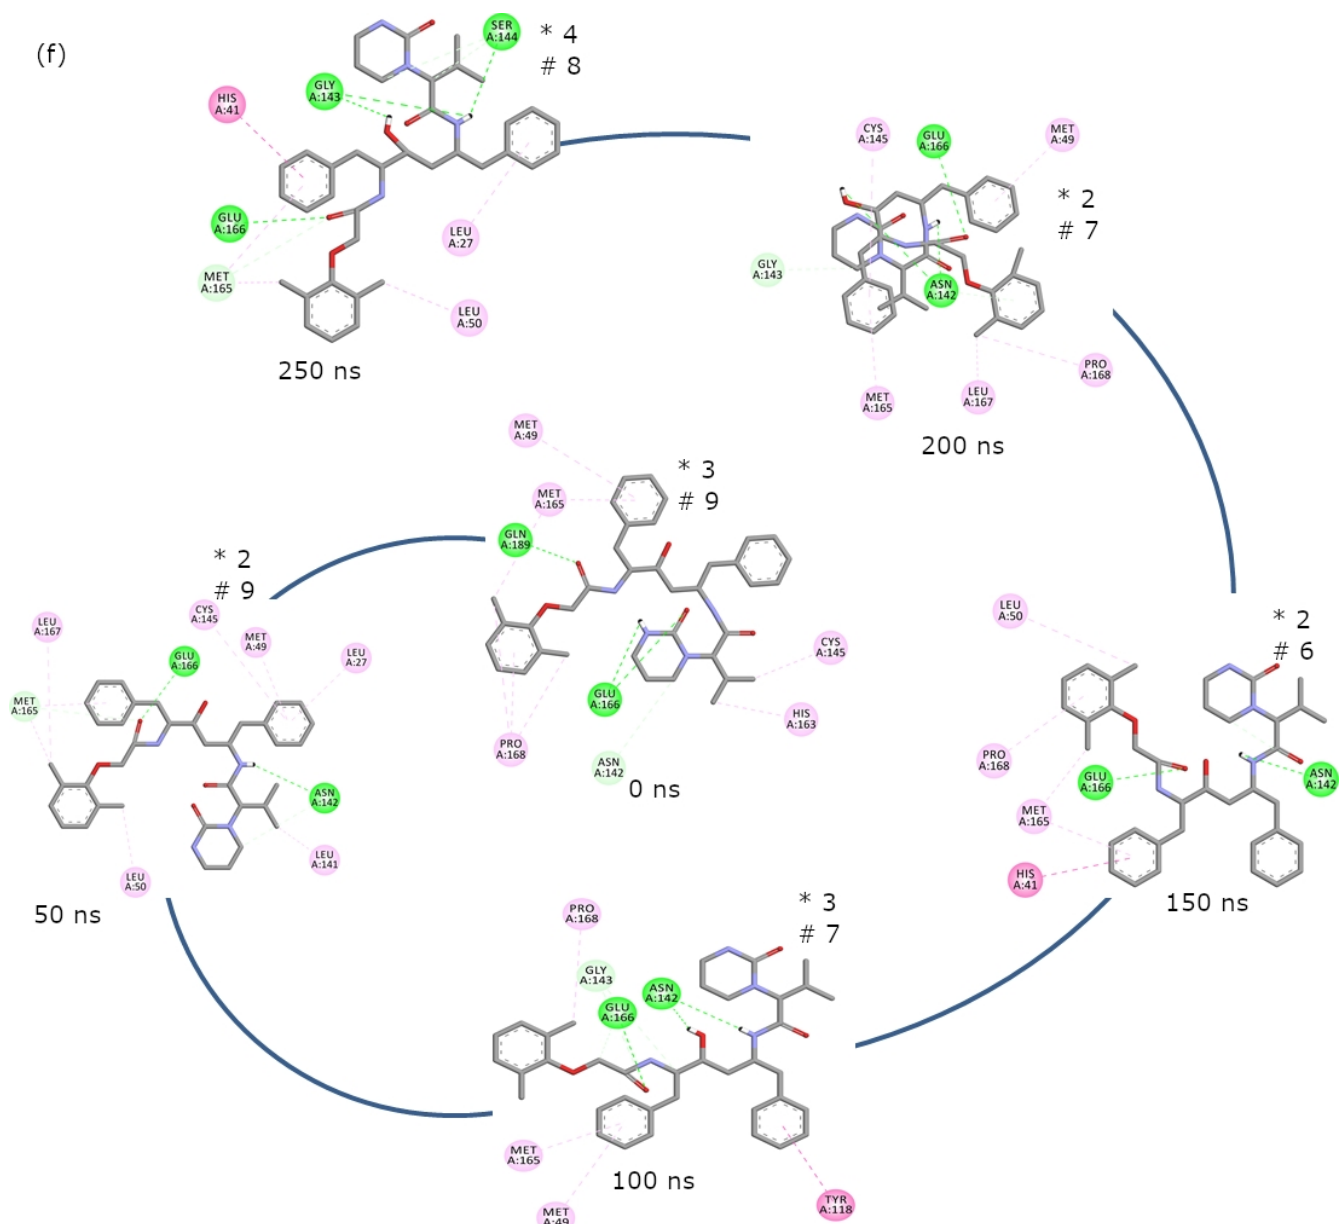

**Figure S3:** 2D interactions showing hydrogen bonds (green) and hydrophobic interactions (Pink, light pink, blue, and cyan) at different time period of MD-simulations in the binding pocket of the SARS-CoV-2 M<sup>pro</sup> visualized by Discovery studio. (a) Theaflavin-3-O-gallate (b) Oolonghomobisflavan-A (c) Theasinensin-D (d) Atazanavir (e) Darunavir, and (f) Lopinavir.

\* No. of hydrogen bonds

# No. of hydrophobic interactions
